# Supplementary material for: Identification of immunogenic LY6K long peptide encompassing both CD4+ and CD8+ T-cell epitopes and eliciting CD4+ T-cell immunity in patients with malignant disease
Source: PubMed Central journal article supplement — Oncoimmunology. 2014 Mar 27;3:e28100. doi: 10.4161/onci.28100 (PMC4203508; doi:10.4161/onci.28100), 2014-03-27
Supplement: onci-3-e28100-s01.pdf [file onci-3-e28100-s01.pdf]

## **Supplemental Material to:**

**Yusuke Tomita, Akira Yuno, Hirotake Tsukamoto,  
Satoru Senju, Yasuhiro Kuroda, Masatoshi Hirayama,  
Yuya Imamura, Junji Yatsuda, Mohammad Abu Sayem,  
Atsushi Irie, Akinobu Hamada, Hirofumi Jono,  
Koji Yoshida Takuya, Tsunoda, Yataro Daigo,  
Hirotsugu Kohrogi, Yoshihiro Yoshitake, Yusuke Nakamura,  
Masanori Shinohara, and Yasuharu Nishimura**

**Identification of LY6K long peptide immunogenic variants  
encompassing both CD4+ and CD8+ T-cell epitopes and  
eliciting CD4+ T-cell immunity in patients with malignant  
disease**

**Oncolmunology 2014; 3(February)**

**<http://dx.doi.org/10.4161/onci.28100>**

**[http://www.landesbioscience.com/journals/oncoimmunology/  
article/28100/](http://www.landesbioscience.com/journals/oncoimmunology/article/28100/)**

Supplementary figure 1.

A

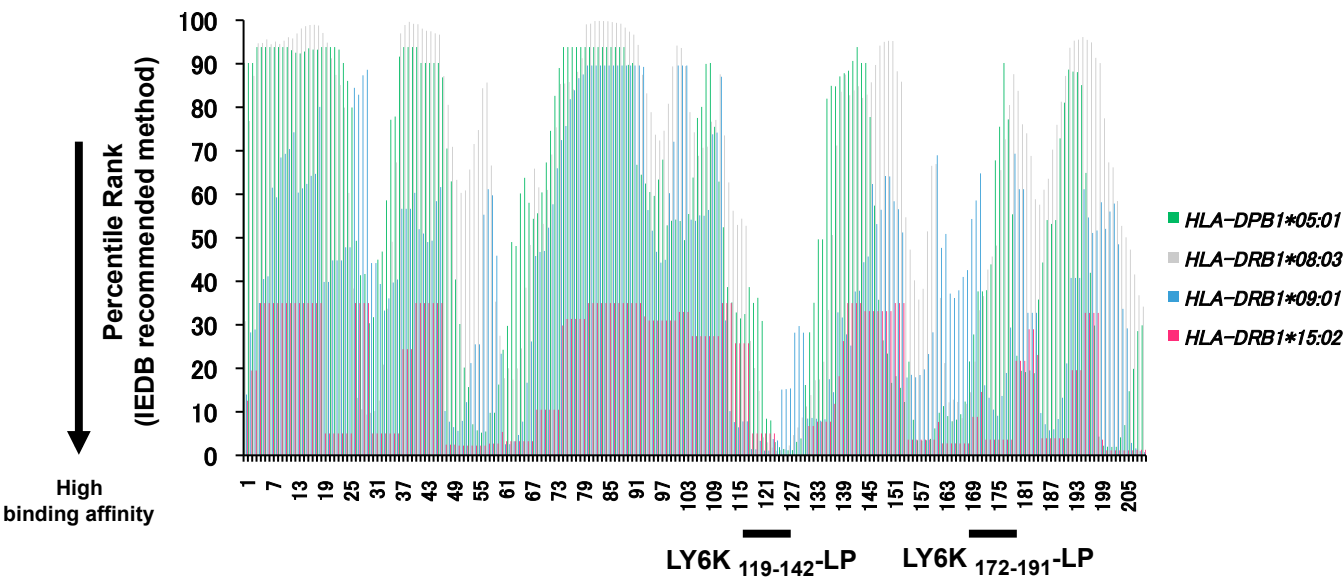

B

LY6K<sub>119-142</sub>-LP: KWTEPYCVIAAVKIFPRFFMVAKQ

LY6K<sub>172-191</sub>-LP: KCCKIRYCNLEGPPINSSVF

LY6K<sub>177-186</sub>-A24

C

HD2: DRB1\*08:03/15:02

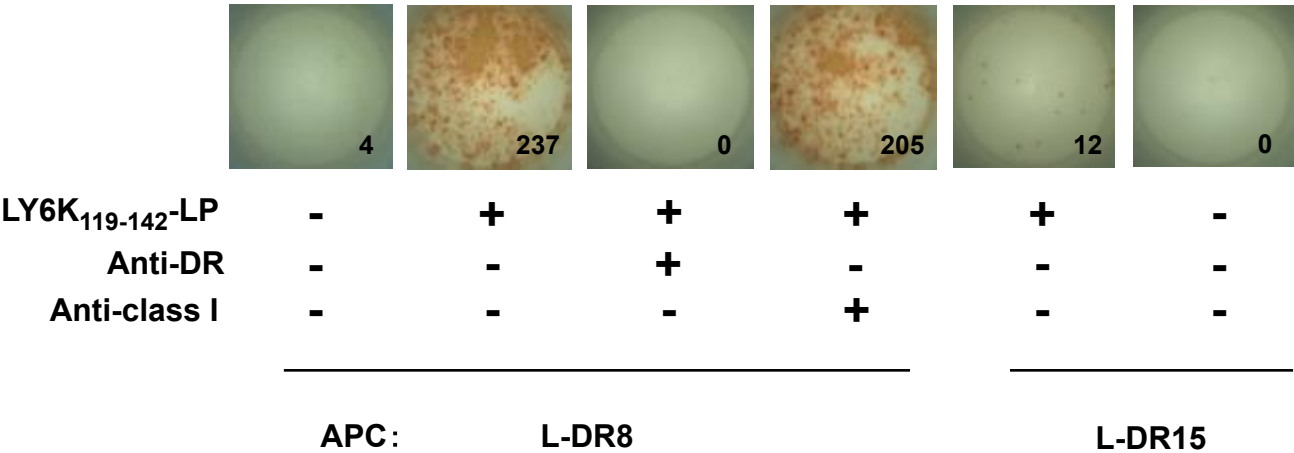

**Supplementary figure 1.** LY6K-derived HLA class II-binding LPs predicted by immune epitope database (IEDB) analysis resource. **A**, The amino acid sequence of the human LY6K protein was analyzed using IEBD (IEDB recommended method), [http://tools.immuneepitope.org/analyze/html/mhc\\_II\\_binding.html](http://tools.immuneepitope.org/analyze/html/mhc_II_binding.html). Numbers on the horizontal axis indicate amino acid positions at the N-terminus of LY6K-derived 15-mer peptides. Lower number of percentile rank indicates stronger binding affinity to HLA class II molecules. **B**, The 24-mer LP, LY6K<sub>119-142</sub>-LP with high percentile ranks for multiple *HLA-class II* allelic (*DPB1\*05:01*, *DRB1\*08:03*, *DRB1\*09:01*, and *DRB1\*15:02*) products was synthesized (**A**, left black bar). The 20-mer LP, LY6K<sub>172-191</sub>-LP with high percentile ranks for 2 HLA-class II allelic (*DRB1\*09:01* and *DRB1\*15:02*) products and encompassing a 10-mer CTL-epitope recognized by HLA-A24-restricted CTLs was synthesized (**A**, right black bar). **C**, Induction of LY6K-specific Th cells from healthy donors. Supplementary figure 1C shows representative images of wells in IFN- $\gamma$  ELISPOT assay from one healthy donor HD2.

## Supplementary table 1

Binding algorithm scores of LY6K-derived peptides for HLA-class II molecules

| Amino acid<br>residues position | Percentile Rank                  |                                  |                                  |                                   |
|---------------------------------|----------------------------------|----------------------------------|----------------------------------|-----------------------------------|
|                                 | HLA-DP5<br>( <i>DPB1*05:01</i> ) | HLA-DR8<br>( <i>DRB1*08:03</i> ) | HLA-DR9<br>( <i>DRB1*09:01</i> ) | HLA-DR15<br>( <i>DRB1*15:02</i> ) |
| LY6K <sub>119-142</sub> LP      |                                  |                                  |                                  |                                   |
| 119-133                         | 35.0                             | 20.1                             | 1.4                              | 5.0                               |
| 120-134                         | 36.2                             | 14.8                             | 3.3                              | 5.0                               |
| 121-135                         | 30.9                             | 4.1                              | 1.1                              | 5.0                               |
| 122-136                         | 8.4                              | 3.0                              | 1.1                              | 5.0                               |
| 123-137                         | 8.0                              | 1.8                              | 3.7                              | 5.0                               |
| 124-138                         | 3.0                              | 1.0                              | 3.4                              | 0.02                              |
| 125-139                         | 1.9                              | 1.2                              | 15.1                             | 0.02                              |
| 126-140                         | 1.5                              | 1.4                              | 15.2                             | 0.02                              |
| 127-141                         | 1.2                              | 2.3                              | 15.4                             | 0.02                              |
| 128-142                         | 1.2                              | 4.7                              | 28.2                             | 0.02                              |
| LY6K <sub>172-191</sub> LP      |                                  |                                  |                                  |                                   |
| 172-186                         | 37.7                             | 36.6                             | 16.1                             | 3.6                               |
| 173-187                         | 37.9                             | 42.7                             | 13.2                             | 3.6                               |
| 174-188                         | 43.9                             | 45.7                             | 10.5                             | 3.6                               |
| 175-189                         | 67.8                             | 48.2                             | 9.1                              | 3.6                               |
| 176-190                         | 75.5                             | 65.6                             | 13.7                             | 3.6                               |
| 177-191                         | 90.2                             | 72.6                             | 18.9                             | 3.6                               |

Peptide-binding algorithm scores for indicated HLA-class II molecules are shown for each 15-mer LY6K-derived peptide.

# Supplementary figure 2

**A**

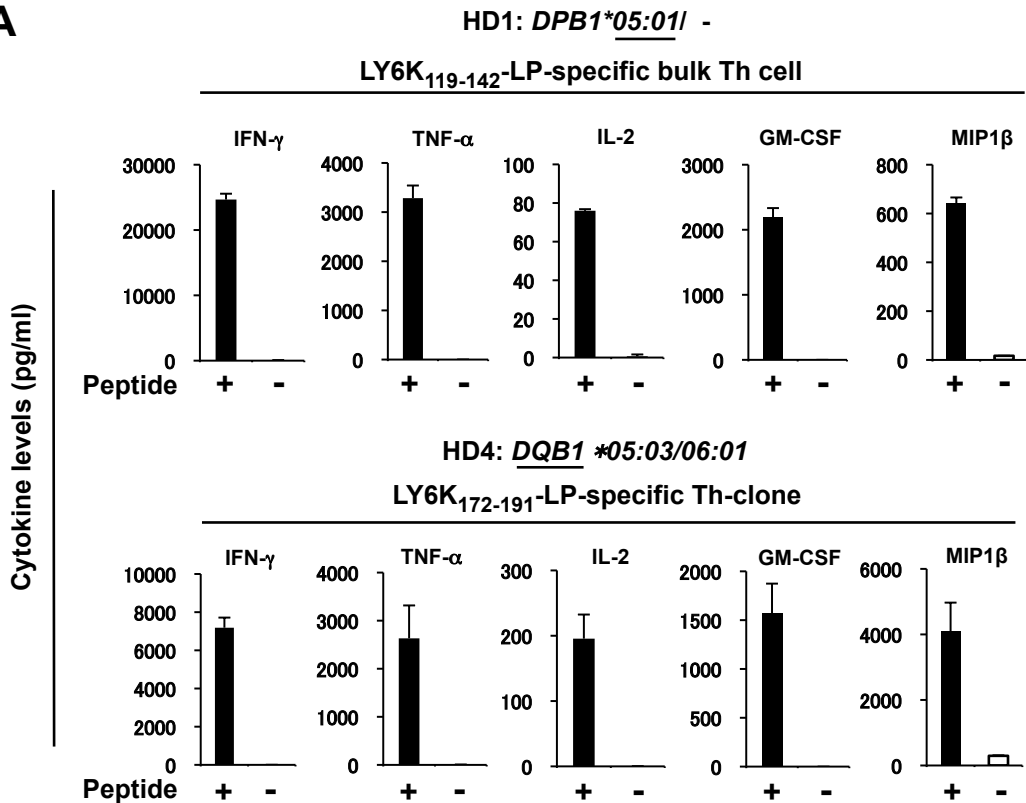

**B**

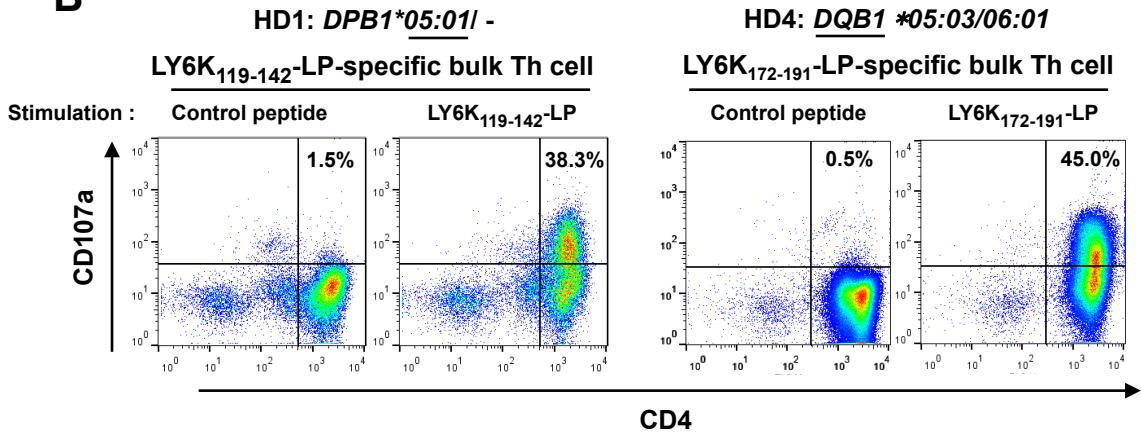

**Supplementary figure 2.** Cytokine profile produced by LY6K<sub>119–142</sub>-LP-specific bulk Th cells and a LY6K<sub>172–191</sub>-LP-specific Th-clone. **A**, After 24 h incubation of Th cells co-cultured with cognate peptides-pulsed autologous PBMCs, the culture supernatant was collected and the concentration of cytokines (IFN- $\gamma$ , TNF- $\alpha$ , IL-2, GM-CSF, and MIP1 $\beta$ ) was measured using the Bio-Plex assay system. Data are presented as the mean  $\pm$  SD of triplicate assays. **B**, Detection of CD107a on the cell surface of bulk LY6K-LP-specific CD4<sup>+</sup> T-cells after antigenic stimulation. Cells were restimulated with LY6K-LPs or a control peptide. The numbers inside the plots indicate the percentage of the cell population with the quadrant characteristic (CD4<sup>+</sup> CD107a<sup>+</sup> T-cells).

Supplementary figure 3.

Page 1/3.

A

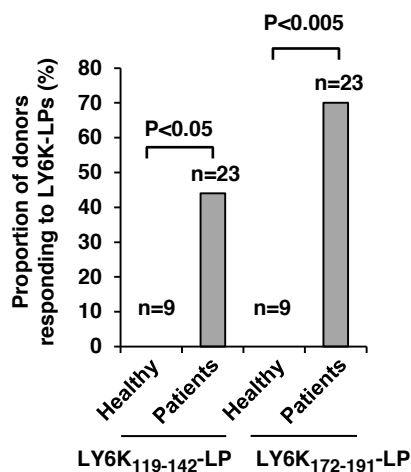

B

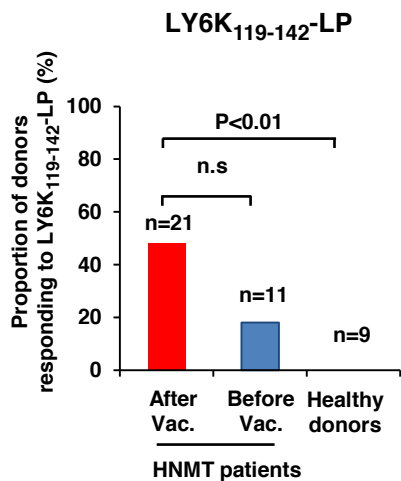

C

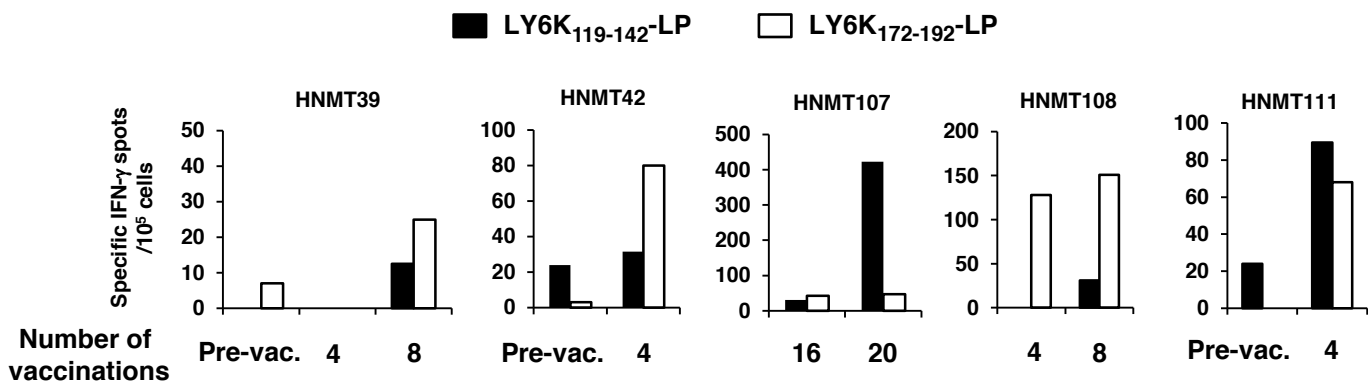

D

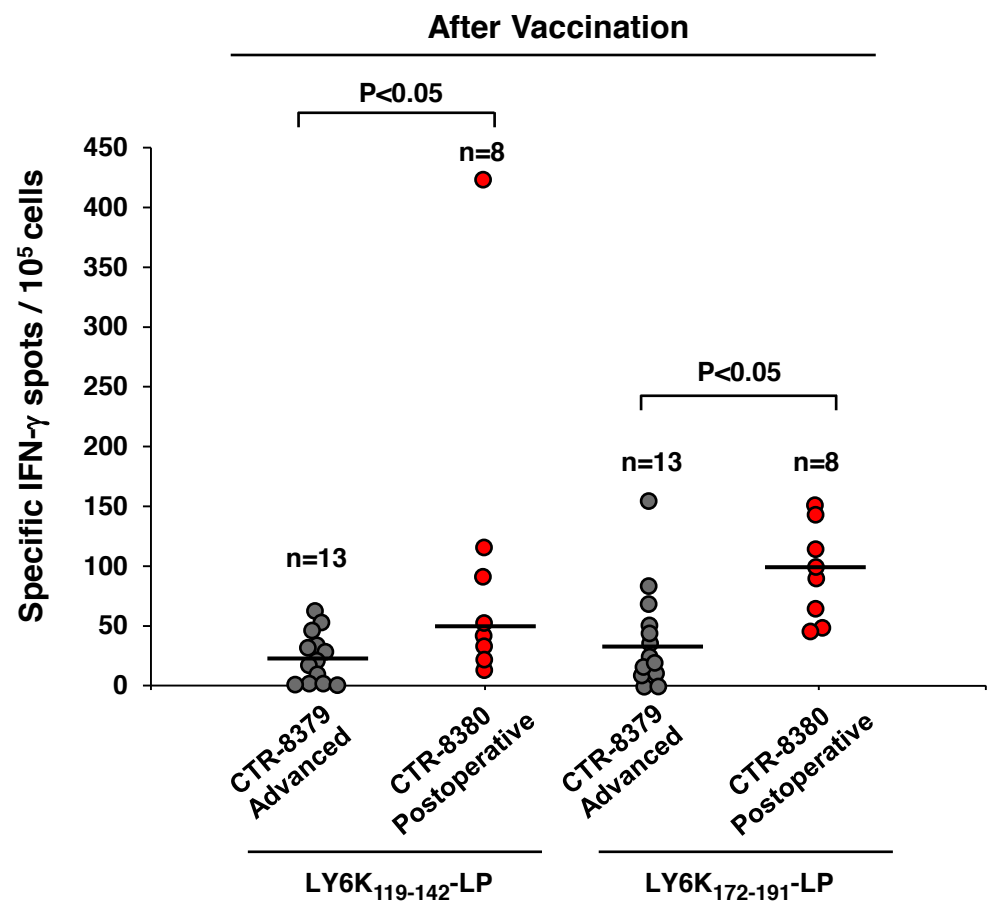

**Supplementary figure 3.** Presence of LY6K-LPs-specific Th cells in PBMCs obtained from HNMT patients before and after vaccination. After *in vitro* stimulation of PBMCs with a mixture of LY6K<sub>119-142</sub>-LP and LY6K<sub>172-191</sub>-LP for 1 week, the frequency of LY6K-LP-specific T-cells was detected by IFN- $\gamma$  ELISPOT assay. **A**, HNMT patients (n=23) showed elevated LY6K-LP-specific Th cell immunity compared to normal healthy individuals (n=9). Bar graph showing proportion of patients and healthy donors (control) responded to LY6K<sub>119-142</sub>-LP or LY6K<sub>172-191</sub>-LP. *p* values were calculated using Fisher's exact probability test. **B**, The frequency of LY6K<sub>119-142</sub>-LP-specific immune response in HNMT patients after vaccination was significantly higher than in healthy donors. Colom graph showing proportion of patients and healthy donors (control) responded to LY6K<sub>119-142</sub>-LP. *p* values were calculated using Fisher's exact probability test. **C**, The repeated CTL-epitope peptide vaccinations augmented or elicited LY6K<sub>119-142</sub>-LP (black bars) and LY6K<sub>172-191</sub>-LP (white bars)-specific Th cell responses. **D**, A comparison of the numbers of LY6K-LP-specific IFN- $\gamma$  spots between vaccinated HNMT patients with advanced cancer (CTR-8379, Advanced, n = 13) and vaccinated HNMT patients receiving postoperative adjuvant immunotherapy (CTR-8380, Postoperative, n = 8). After 1-week *in vitro* stimulation of PBMCs with a mixture of LY6K<sub>119-142</sub>-LP and LY6K<sub>172-191</sub>-LP, the frequency of individual LY6K-LP-specific Th cells was detected by IFN- $\gamma$  ELISPOT assay. The results represent specific IFN- $\gamma$  spots after background subtraction. Each dot represents an individual donor. Horizontal lines denote median values, and *p* values represent statistical results from a nonparametric Mann-Whitney *U* test. n.s., not significant.

Supplementary figure 4

Page 1/2

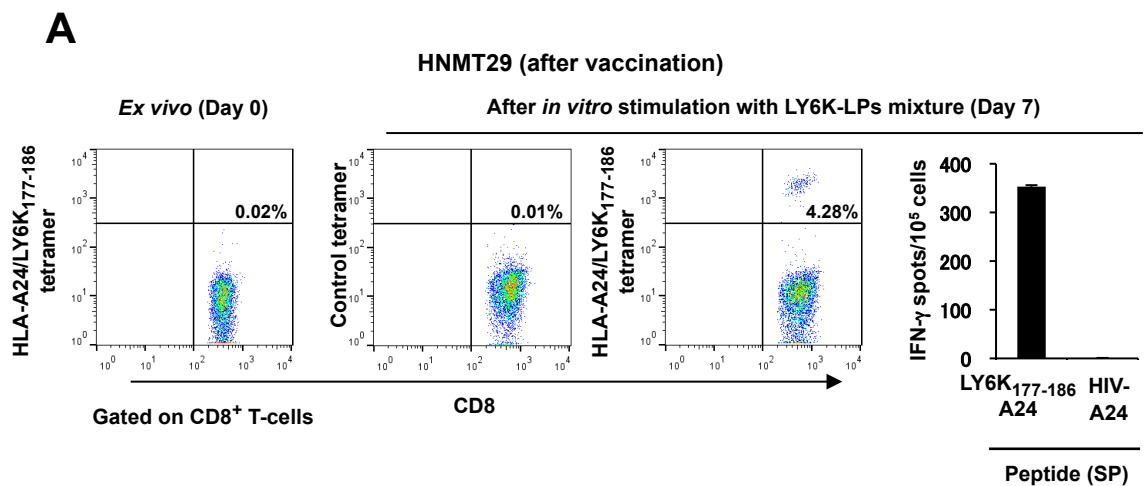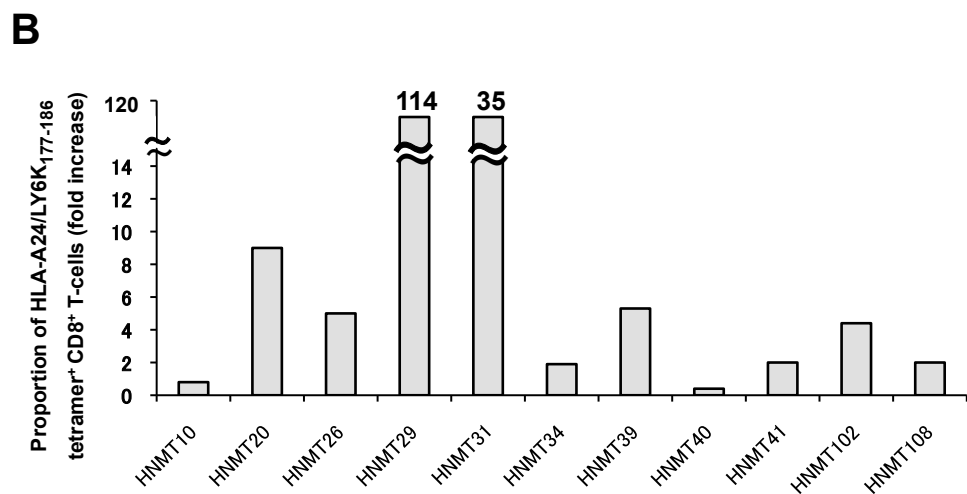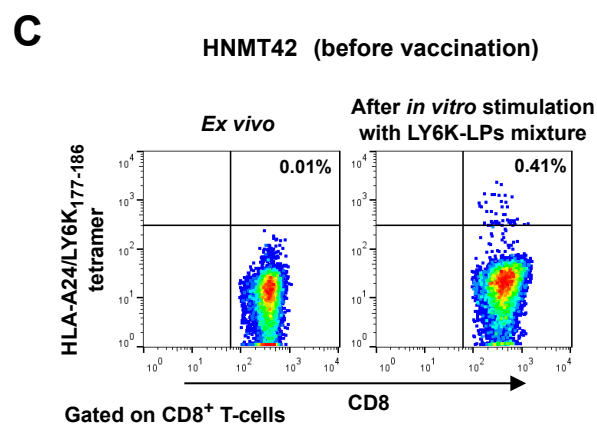

**Supplementary figure 4.** LY6K-LPs induces *in vitro* expansion of LY6K<sub>177-186</sub>-A24 SP-specific CTLs in HNMT patients. **A**, Fresh PBMCs from the HNMT patient (HNMT29) vaccinated with LY6K<sub>177-186</sub>-A24 SP were cultured with a mixture of LY6K<sub>119-142</sub>-LP and LY6K<sub>172-191</sub>-LP. On day 0 (*ex vivo*) and day 7 (after *in vitro* stimulation with LY6K-LPs), the PBMCs were stained with HLA-A\*24:02/LY6K<sub>177-186</sub>-specific tetramer (gated on CD8<sup>+</sup> T-cells). On day 7, the frequency of LY6K<sub>177-186</sub>-A24-specific CTLs was also detected by IFN- $\gamma$  ELISPOT assay (bar graph). Representative data from 9 vaccinated HNMT patients ( HNMT20, 26, 29, 31, 34, 39, 41, 102, and 108) with similar results are shown. **B**, The increases (fold increase) in proportion of CD8<sup>+</sup> tetramer<sup>+</sup> cells are shown. **C**, Fresh PBMCs from an HNMT patient before vaccination (HNMT42) were stimulated with a mixture of LY6K-LPs.

## Supplementary figure 5

**A**

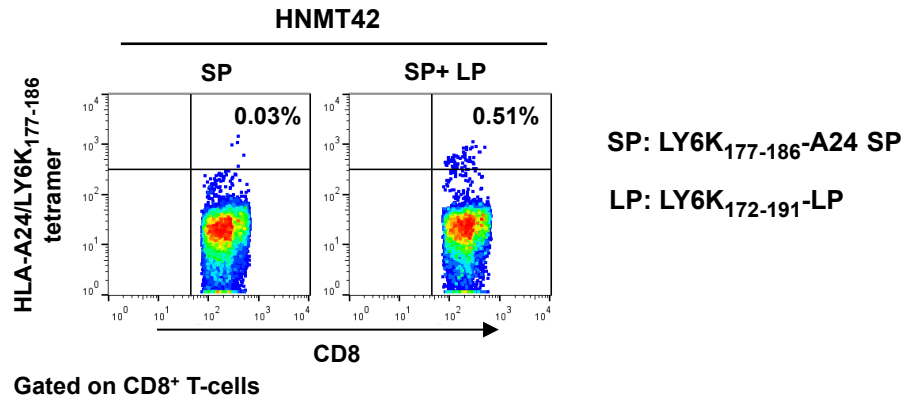

**B**

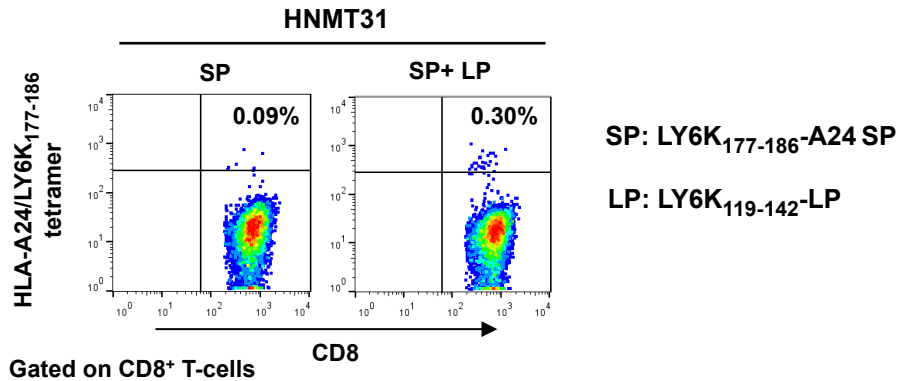

**Supplementary figure 5.** The synergistic effect of LY6K-LPs on induction of LY6K<sub>177-186</sub>-A24 SP-specific CTLs. Fresh PBMCs obtained from a vaccinated HNMT patients (A, HNMT42; B, HNMT31) were cultured for 7 days with LY6K<sub>177-186</sub>-A24 SP (SP) or SP + LY6K-LP (SP + LP). Representative HLA-A24/LY6K<sub>177-186</sub>-specific tetramer staining (gated on CD8<sup>+</sup> T-cells) obtained from duplicate wells with similar results is shown.

**Supplementary table 2*****HLA-A, -DR, and -DP genotypes of healthy donors***

| <b>Donor ID</b> | <b><i>HLA-A</i> genotype</b> | <b><i>HLA-DRB1</i> genotype</b> | <b><i>HLA-DPB1</i> genotype</b> |
|-----------------|------------------------------|---------------------------------|---------------------------------|
| HD1             | <i>A*02:01 / 24:02</i>       | <i>DRB1*04:05 / -</i>           | <i>DPB1*05:01 / -</i>           |
| HD2             | <i>A*11:01 / 31:01</i>       | <i>DRB1*08:03 / 15:02</i>       | <i>DPB1*02:01 / 09:01</i>       |
| HD3             | <i>A*24:02 / -</i>           | <i>DRB1*08:02 / 15:02</i>       | <i>DPB1*05:01 / 09:01</i>       |
| HD4             | <i>A*24:02 / 31:01</i>       | <i>DRB1*08:03 / 14:05</i>       | <i>DPB1*02:02 / 05:01</i>       |
| HD5             | <i>A*02:01 / 02:06</i>       | <i>DRB1*04:05 / 09:01</i>       | <i>DPB1*02:01 / 04:02</i>       |
| HD6             | n.t.                         | <i>DRB1*04:06 / 08:03</i>       | <i>DPB1*02:01 / 04:02</i>       |
| HD7             | <i>A*26:01 / 33:03</i>       | <i>DRB1*04:05 / 13:02</i>       | <i>DPB1*04:01 / 09:01</i>       |
| HD8             | <i>A*26:01 / -</i>           | <i>DRB1*04:10 / 08:02</i>       | <i>DPB1*02:01 / 05:01</i>       |
| HD9             | <i>A*31:01 / 33:03</i>       | <i>DRB1*09:01 / 13:02</i>       | <i>DPB1*03:01 / 04:01</i>       |

PBMCs derived from healthy donors (HD1-HD9) were used as controls in Figure 5B.

HLA, human histocompatibility leukocyte antigen; n.t., not tested
